# Supplementary material for: Construction, Investigation and Application of TEV Protease Variants with Improved Oxidative Stability
Source: PubMed Central journal article supplement (PMC9705859; doi:10.4014/jmb.2106.06075), 2021-09-10
Supplement: jmb-31-12-1732-supple.pdf [file jmb-31-12-1732-supple.pdf]

## Supplementary Materials

Table S1. The primers used in this study

| Primer | Sequence(5'-3')                               |
|--------|-----------------------------------------------|
| C19S1  | F: GATATCGAGCAGCATT <u>AG</u> TTCATTTGACGAATG |
| C19S2  | R: CATTTCGTCAAATGACTAATGCTGCTCGATATC          |
| C110S1 | F: GTGAAGAGCGCATT <u>AG</u> TCTTGTGACAACCAAC  |
| C110S2 | R: GTTGGTTGTCACAAGACTAATGCGCTCTTCAC           |
| C130S1 | F:GTGTCAGACACTAGT <u>AG</u> CACATTCCTTCAG     |
| C130S2 | R:CTGAAGGGAATGTGCTACTAGTGTCTGACAC             |
| mPex1  | F: CTC <u>GATCC</u> CAACTCATGGTCGGATACTACAAG  |
| mPex2  | R: CAGTCTC <u>GAGT</u> TAGGACCTGCTGTTGACCTTGC |

F: forward primer. R: reverse primer. The restrictive enzyme cut sites are indicated by the underlines. The mutated bases in the forward primers are marked in red.

```

mHRP      -----QLTPTFYDNSCP NVSN
mPex      MTTSKLAVLTLFALLGSVSCQSGGYFYPTPQQPSPTSPSPSSPQLMVGYYKDKCAAYVD
                                         **  :*.:.*.  :

mHRP      IVRDTIVNELRSDPRIAASILRLHFHDCFVNGCDASILLD---NTTSFRTEKDAFGNANS
mPex      VEAIVKKHKVKTADAGMQAGLVRLLFHDCFVRGCDGSVLLDTFSNDSLTPKFGVFNFP
:   .   :   :*. : *.:** *****.***. *:***  * **: .** .. * *

mHRP      ARGFPVIDRMKAAVESACPRTVSCADLLTIAAQQS--VTLAGGPSWRVPLGRRDSLQAF
mPex      LRGFEVIDAAKAEIEAACPGTVSCADIVAFARDASYFLSGGGISFAMPAGRYDGNVSLA
*** **  *  :*:*** *****:>:::***:::  .  .** *: :* ** * .  ::

mHRP      DLANANLPAPFFTLPLQLKDSFRNVGLNRSSDLVALSGGHTFGKNQCRFIMDRLYNFSNTG
mPex      SETLPNLPSPTGFDQLVKVFADKGLD-AFDMITLSGAHSIGRSHCSSFTRDRLPSPNTT
.  :  .***:**  : ** . * : ** : *:::***.***:*.:.:*  :      ***

mHRP      LPDPTLNTTYLQTLRGLCPLNGNLSALVDFDLRTP TIFDNKYYVNLEEQKGLIQSDQELF
mPex      DIDP----AFAATLQASCASPNGTDNTVMQDFKTPDVLDNQYYKNVLAHKVLF TSDAALT
**      ::  **: . * .  . . *  *:** :***:** * : :* * : ** *

mHRP      SSPNATDTIPLVRSFANSTQTFFN-AFVEAMDRMGNITPLTGTQGQIRLNCRVNSNS
mPex      TNFTSNN---LVRAYADFPYLWQQKFAKAMVKMAGVEIKTAANGEIRKTCRKVNSRS
.  .: :  ***:*. :  ::: *.:** :*..:  *.:*:** .** **.*

```

Fig. S1. Alignment of the deduced amino acid sequences of mature HRP (mHRP) with mPex. Identical amino acid residues are represented by asterisks. The alignment was performed using CLUSTALW (<https://www.genome.jp/tools-bin/clustalw>).

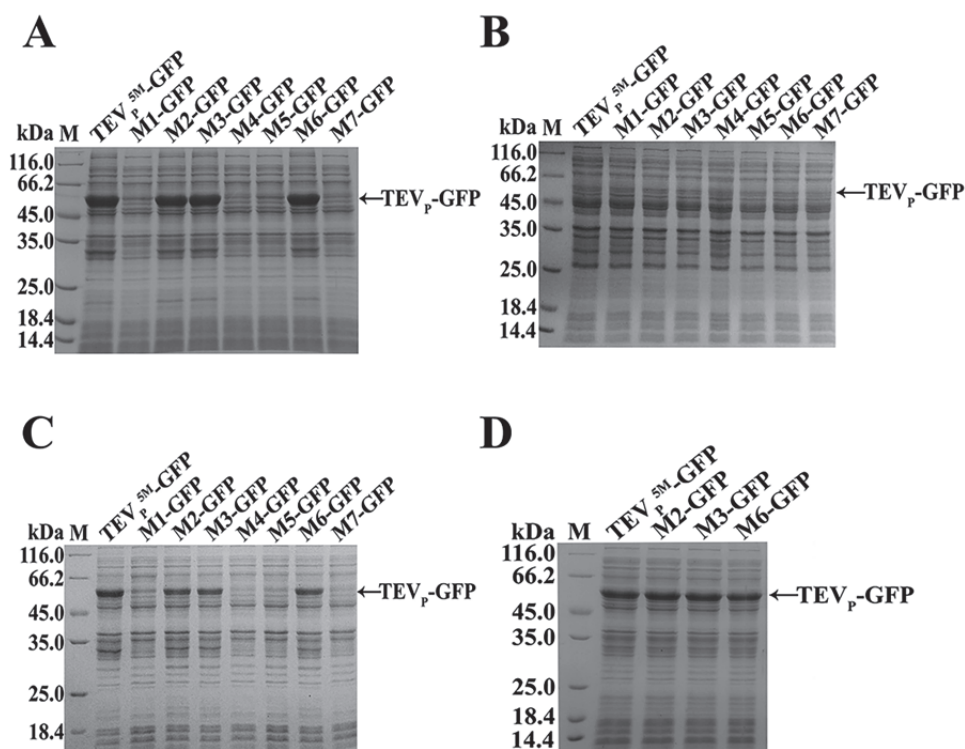

Figure S2 SDS-PAGE analysis of the C-terminally EmGFP tagged TEVp<sup>5M</sup> and its variants. About 10  $\mu$ g soluble proteins expressed in BL21(DE3) (a), BL21(DE3)pLysS (b), Rosetta (DE3) (c) and Origami (DE3) (d) were separated by 12% SDS-PAGE.

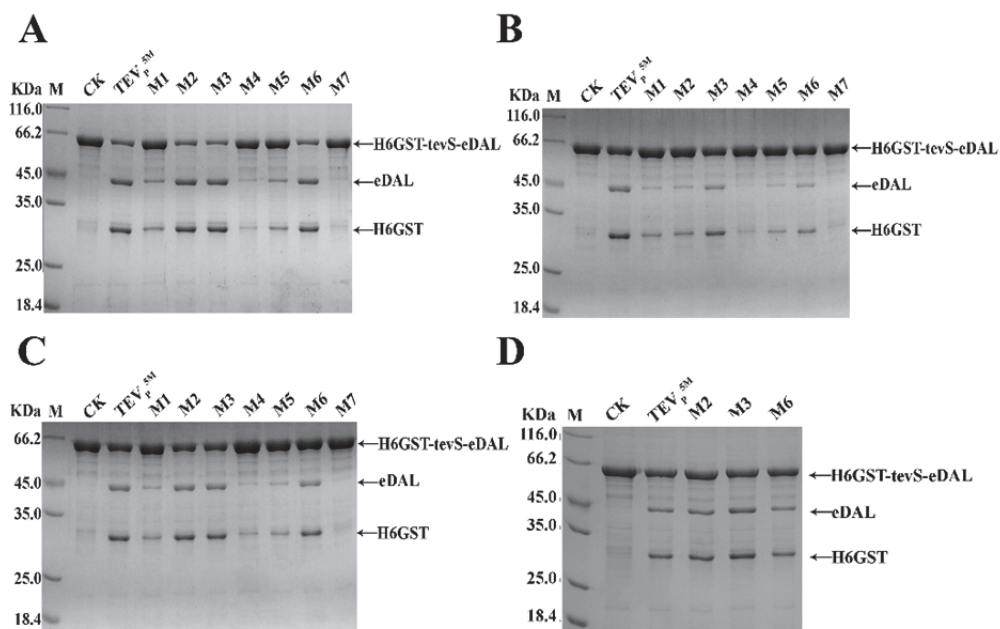

Figure S3 SDS-PAGE analysis of the purified fusion protein incubating with the TEVp construct in crude extract. CK: the fusion protein incubating with the soluble extract from the correspondent cells carrying the pET-28b or pET-22b plasmids. The fusion protein substrate and cleaved products were indicated by arrows.

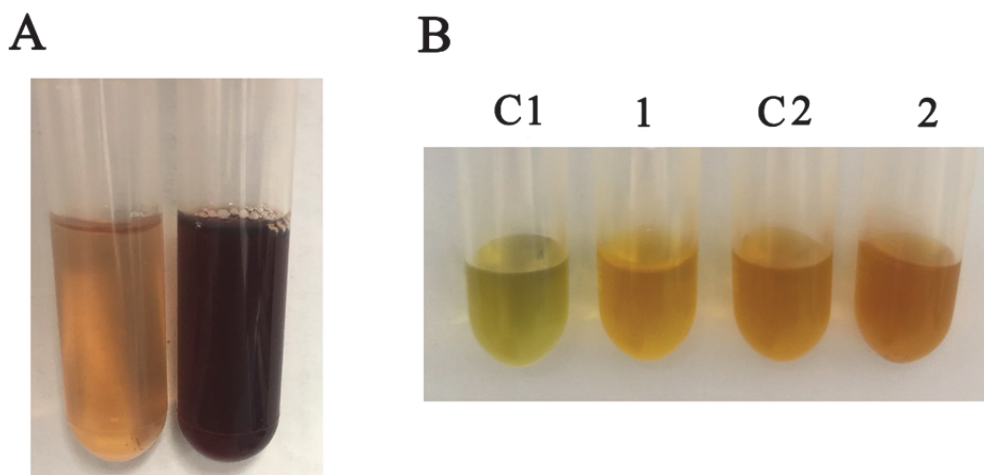

Figure S4 **The activity assay of the bEK and mPex.** A: the **refolded tag-free** bEK cleaved the fusion protein for the sDAL, rendering the released sDAL with the obviously increased activity for transformation of DL-DAP and coloration of pyruvate as the catalytic product with DNP. B: The activity assay of the **refolded tag-free** mPex. C1 and C2 represented the reaction mixture containing 10 mM or 30 mM  $H_2O_2$  with addition of the heat-inactive mPerx (100 °C for 10 min). 1 and 3 represented the mixture with addition of the refolded mPex and OPA. **Activity assays** of the bEK and mPex were described in Material and Methods section.
